1 **Original article**

2

3 **Bacterial pulmonary superinfections are associated with unfavourable outcomes in**  
4 **critically ill COVID-19 patients**

5

6 Philipp K. Buehler<sup>1\*</sup>, Annelies S. Zinkernagel<sup>2\*</sup>, Daniel A. Hofmaenner<sup>1\*</sup>, Pedro David Wendel  
7 García<sup>1</sup> Claudio T. Acevedo<sup>2</sup>, Alejandro Gómez-Mejía<sup>2</sup>; Srikanth Mairpady Shambat<sup>2</sup>, Federica  
8 Andreoni<sup>2</sup>, Martina A. Maibach<sup>1</sup>, Jan Bartussek<sup>1,4</sup>, Matthias P. Hilty<sup>1</sup>, Pascal M. Frey<sup>3</sup>, Reto A.  
9 Schuepbach<sup>1\*\*</sup>, Silvio D. Brugger<sup>2\*\*</sup>

10

11

12 <sup>1</sup> Institute for Intensive Care Medicine, University Hospital Zurich and University of Zurich,  
13 Zurich, Switzerland

14 <sup>2</sup> Department of Infectious Diseases and Hospital Epidemiology, University Hospital Zurich,  
15 University of Zurich, Zurich, Switzerland

16 <sup>3</sup> Department of General Internal Medicine, Bern University Hospital, University of Bern, Bern,  
17 Switzerland

18 <sup>4</sup> Department of Quantitative Biomedicine, University Hospital Zurich, and University of Zurich,  
19 Zurich, Switzerland

20

21 \* These authors contributed equally to the work

22 \*\* These authors contributed equally to the work

23

24

25 Running title: Superinfection in COVID-19 patients

26

27 Correspondence to:

28 Silvio D. Brugger, M.D., Ph.D.

29 Division of Infectious Diseases and Hospital Epidemiology

30 University Hospital Zurich

31 Raemistrasse 100

32 CH-8091 Zurich

33 Switzerland

34 Phone +41 44 255 25 41 E-Mail: [silvio.brugger@usz.ch](mailto:silvio.brugger@usz.ch)

35 **Keywords:** severe acute respiratory syndrome coronavirus 2 (SARS-CoV-2), coronavirus  
36 disease 19 (COVID-19), acute respiratory distress syndrome (ARDS), superinfection, coinfection  
37

38 **Abstract**

39

40 **Objectives**

41 While superinfections are associated with unfavourable disease course, their impact on clinical  
42 outcomes in critically ill COVID-19 patients remains largely unknown. We aimed to investigate  
43 the burden of superinfections in COVID-19 patients.

44

45 **Methods**

46 In this prospective single centre cohort study in an intensive care setting patients aged  $\geq 18$  years  
47 with COVID-19 acute respiratory distress syndrome were assessed for concomitant microbial  
48 infections by longitudinal analysis of tracheobronchial secretions, bronchoalveolar lavages and  
49 blood. Our primary outcome was ventilator-free survival on day 28 in patients with and without  
50 clinically relevant superinfection. Further outcomes included the association of superinfection  
51 with ICU length of stay, incidence of bacteremia, viral reactivations, and fungal colonization.

52

53 **Results**

54 In 45 critically ill COVID-19 patients, we identified 19 patients with superinfections (42.2%) by  
55 longitudinal analysis of 433 TBS, 35 BAL and 455 blood samples, respectively. On average,  
56 superinfections were detected on day 10 after ICU admission. The most frequently isolated  
57 clinically relevant bacteria were Enterobacteriaceae, *Streptococcus pneumoniae*, and  
58 *Pseudomonas aeruginosa*.

59 Ventilator-free survival was substantially lower in patients with superinfection (subhazard ratio  
60 0.37, 95%-CI 0.15-0.90,  $p=0.028$ ). Patients with pulmonary superinfections more often had  
61 bacteraemia, virus reactivations, yeast colonization, and needed ICU treatment for a significantly  
62 longer time.

63

64 **Conclusions**

65 The detection of superinfections was frequent and associated with reduced ventilator-free  
66 survival. Despite empirical antibiotic therapy, superinfections lead to an extended ICU stay in  
67 COVID 19 patients. Longitudinal microbiological sampling in COVID-19 patients could allow  
68 targeted antimicrobial therapy, and therefore minimize the use of broad-spectrum and reserve  
69 antibiotics.

70

71 **Introduction**

72 The severe acute respiratory syndrome coronavirus 2 (SARS-CoV-2) evolved as the most  
73 relevant pandemic of modern history, challenging health care systems all over the world. The  
74 clinical characteristics of coronavirus disease (COVID-19) patients have been thoroughly  
75 described in recent studies (1-5). The triggers for acute respiratory distress syndrome (ARDS) in  
76 COVID-19 are initially virus-initiated, subsequently leading to inflammation-mediated lung  
77 damage and endothelitis (5). Although primarily a viral disease, antibiotics are empirically used  
78 in over 70% of cases in addition to experimental antiviral and immunomodulatory treatments (1,  
79 4-7).

80 Secondary bacterial and/or fungal infections are a well-described phenomenon in viral illnesses  
81 such as influenza and are associated with increased morbidity and mortality in viral ARDS as  
82 illustrated during previous pandemics (8). Secondary bacterial infections are typically referred to  
83 as superinfections whereas co-infection is mainly used to describe simultaneous virus infection.  
84 Both, co- and superinfection have been described in COVID-19 patients (6, 9). Data regarding  
85 bacterial superinfections in COVID-19 pneumonia are limited and still emerging (10, 11). A  
86 recent systematic review has concluded that the rate of bacterial/fungal superinfections is low  
87 arguing against the frequent use of broad-spectrum antimicrobials in patients with COVID-19  
88 (10, 12). Still, there is a lack of knowledge about the frequency and significance of bacterial,  
89 fungal and viral concomitant infections in critically ill COVID-19 patients.(12) Additionally, in  
90 most studies performed so far, no thorough and systematic sampling for concomitant infections  
91 was performed. The high mortality in severely ill COVID-19 patients is thought to be at least in  
92 part due to secondary infections in addition to viral replication in the lower respiratory tract  
93 leading to severe lung injury and ARDS (6, 13, 14).

94 Superinfection seems to represent a major risk factor for mortality in COVID-19 patients (7, 15-  
95 17). However, the risk of superinfection in mechanically ventilated patients with severe COVID-  
96 19 remains poorly described.

97

98 Currently, the diagnostic and treatment approach for superinfections remains unclear. Classical  
99 criteria for the detection of superinfections are often of limited use in COVID-19 patients.  
100 Clinical symptoms are an expression of the underlying disease of COVID-19 and cannot be used  
101 to reliably distinguish between patients presenting with or without relevant superinfections. For  
102 this reason, several authors have argued in favour of an empirical antibiotic treatment with a  
103 focus on streptococci and staphylococci in severe courses (14). Other opinion leaders

104 recommend longitudinal sampling of severely ill patients for early detection and treatment during  
105 the entire course of the disease (6, 18).

106

107 Rapid diagnosis of co- and superinfection may not only help to improve survival but would also  
108 allow targeted antimicrobial therapy, improving antimicrobial stewardship throughout the course  
109 of the pandemic (18, 19).

110

111 The aim of our study was to assess the burden of superinfections and the association with clinical  
112 outcomes in critically ill patients with COVID ARDS (CARDS) in a tertiary care ICU with  
113 highly regulated antibiotic prescription (20).

114

115

116

117 **Methods**

118

119 **Study design and population**

120 This study was performed within the MicrobiotaCOVID cohort study. The MicrobiotaCOVID  
121 study is a single-centre, prospective observational study conducted at the Institute of Intensive  
122 Care Medicine of the University Hospital Zurich (Zurich, Switzerland) registered at  
123 [clinicaltrials.gov](https://clinicaltrials.gov) (ClinicalTrials.gov Identifier: NCT04410263).

124 Patients with confirmed SARS-CoV-2 infection and CARDS requiring ICU support and mainly  
125 invasive mechanical ventilation hospitalized between April 2020 and June 2020 during the first  
126 COVID-19 wave in Switzerland were eligible.

127 Inclusion criteria were age >18 years, SARS-CoV-2 infection as determined by real-time reverse  
128 transcriptase-polymerase chain reaction (RT-PCR) positivity of nasopharyngeal and/or  
129 pharyngeal swabs, TBS or BAL and hospitalization in the ICU for moderate or severe ARDS  
130 according to the Berlin criteria (21).

131 Exclusion criteria were patients or relatives denying informed consent and patients still being  
132 treated in the ICU when the study period ended.

133

134 **Ethics and study registration**

135 The study was approved by the local ethics committee of the Canton of Zurich, Switzerland  
136 (Kantonale Ethikkommission Zurich BASEC ID 2020 - 00646).

137

138 **Study outcomes**

139 The primary outcome was ventilator-free survival on day 28. Secondary outcomes were length of  
140 hospital stay, ICU stay and duration of ventilation. Further outcomes included the association of  
141 pulmonary superinfection and bacteraemia, other virus co-infections, colonisation with yeast,  
142 bacterial infections with multidrug resistance (MDR), and longitudinal laboratory inflammation  
143 parameters.

144

145 **Sample collection, processing and testing**

146 If the respiratory situation allowed bronchoscopy, BAL was collected upon ICU admission, and  
147 during the later course of the disease if medically indicated and upon discretion of the treating  
148 physicians. TBS was collected from each ventilated patient at least on day 0 (i.e. upon ICU  
149 admission), day 1, day 2, day 3, day 5 and henceforth every 5 days. If the clinical situation did  
150 not allow TBS collection, no sampling was performed.

151 Samples were processed at the Institute for Medical Microbiology and at the Institute for  
152 Medical Virology of the University of Zurich. Standard clinical microbiology techniques were  
153 used for culturing, isolation and identification of bacterial and fungal microorganisms as  
154 previously described (22). SARS-CoV-2 was detected by real-time RT-PCR as previously  
155 described (23).

156 At admission, multiplex PCR for respiratory syncytial virus (RSV) A/B, influenza A/B,  
157 adenovirus, coronavirus 229E, HKU1, NL63 and OC43, human bocavirus, human  
158 metapneumovirus (hMPV), rhino/enterovirus and parainfluenzavirus 1-4 was performed in  
159 nasopharyngeal swabs. Multiplex PCR for the detection of atypical respiratory bacteria was  
160 performed on pharyngeal swabs at ICU admission.

161 Moreover, we assessed serum detection and virus load of the following viruses: herpesviridae  
162 (herpes simplex type I and II (HSV 1 and 2), cytomegalovirus (CMV), Epstein-Barr virus (EBV)  
163 and human herpes virus 6 (HHV6). Additional virus diagnostics, blood and urine cultures were  
164 initiated by the treating physicians according to the clinical situation.

165

#### 166 **Data collection and covariates**

167 Clinical and laboratory data were obtained from electronic health records and included  
168 demographics, comorbidities / risk factors, medication, ICU scores, laboratory values, organ  
169 failure, need for invasive ventilation, need for extracorporeal life support (ECLS), rescue  
170 therapies, length of ICU/hospital stay, and experimental therapy (steroids, hydroxychloroquine,  
171 lopinavir/ritonavir, remdesivir, tocilizumab and empiric antibiotic therapy).

172 Daily measurements of inflammatory parameters (CRP/PCT), the leukocyte count and the  
173 neutrophil/lymphocyte ratio were routinely performed over the first 16 days after ICU admission.

174

#### 175 **Definition of a clinically relevant microorganism in respiratory specimens (TBS and BAL)** 176 **as a proxy for superinfection**

177 The isolation of clinically relevant microorganisms from respiratory specimen cultures of  
178 critically ill COVID-19 patients (TBS and/or BAL) was used as a surrogate parameter for  
179 superinfection in concordance with clinical and radiological data. Patients were considered  
180 positive for clinically relevant microorganisms if the following pathogens were detected in TBS  
181 or BAL: *Streptococcus pneumoniae*, *Staphylococcus aureus*, *Klebsiella* spp., *Haemophilus*  
182 *influenzae*, *Escherichia coli*, *Enterobacter*, *Citrobacter* spp., *Pseudomonas aeruginosa*, and  
183 *Aspergillus* spp (24).

184 Consultants of the infectious disease department unrelated to the study group were involved  
185 daily in the diagnosis and management of patients including specific antimicrobial treatment.  
186 Organisms with low pathogenicity for lung infections such as *Enterococcus* spp., *Candida* spp.,  
187 coagulase-negative Staphylococci and non-pneumococcal Streptococci were reported but not  
188 considered a relevant clinical pathogen of the airways in accordance with the literature (25).  
189 Detection of the herpesviridae herpes simplex 1 and 2 as well as cytomegalovirus, Epstein-Barr  
190 virus, human herpes virus 6 in blood were also reported but were considered to be reactivations.  
191 Viral co-infections/reactivations were only diagnosed if clinical signs of tracheitis or  
192 pathological signs of viral co-infection in cytology were observed.

193

#### 194 **Statistical analyses**

195 Due to the unknown rate of concomitant infections in severely ill COVID-19 patients a power  
196 calculation was not feasible. Comparisons of population characteristics were performed using  
197 Mann-Whitney-U tests and the chi-squared/Fisher exact test for categorical variables, as  
198 appropriate. For longitudinal analysis of laboratory parameters, differences between time points  
199 and superinfection status were tested using linear mixed effects models. To estimate the effect of  
200 superinfections on 28-day ventilator-free survival, we used a competing risk regression model  
201 according to Fine & Gray censored at 28 days, with the event of extubation as outcome event and  
202 death as the competing risk. An alpha level of 0.05 was considered statistically significant.  
203 Statistical analysis was performed using STATA version 15 (StataCorp, College Station, TX), R  
204 version 3.6.3 (r-project.org/), SPSS Version 23 (SPSS Science, Chicago, IL, USA) and Graphpad  
205 Prism 7 (San Diego, CA, USA).

206



## 207 **Results**

### 208 **Cohort characteristics**

209 A total of 48 critically ill COVID-19 patients with ARDS were screened in ICU at the University  
210 Hospital Zurich between April and June 2020. Three patients had to be excluded from the  
211 analysis because patients or relatives denied informed consent (Figure 1). 45 patients with a  
212 median age of 60 (54-69) years were included in this study. Most of them were male (35/45,  
213 77.8%). Of the 45 patients, 19 (42.2%) were diagnosed with a superinfection. The median of  
214 ventilation duration was 15 days and length of ICU stay was 14 days overall. The median length  
215 of hospital stay was 24 days. Baseline characteristics are summarised in Table 1. In general, both  
216 groups of patients with and without superinfections were similar with regards to demographics  
217 and clinical characteristics. In particular, there were no differences in the severity of the disease  
218 and organ dysfunction as assessed by SAPS II and SOFA scores. Intensive care rescue therapies  
219 such as prone position (42% vs 90%) and tracheotomy (23% vs 74%) were required more  
220 frequently and/or for longer periods in the superinfection group (Table 1).

221

### 222 **Microbiological sampling and superinfections**

223 Overall, 433 TBS, 35 BAL samples and 455 blood culture pairs were analysed for the presence  
224 of relevant microorganisms (Figure 1).

225 Clinically relevant microorganisms were detected in TBS in almost half the cases. In nineteen  
226 patients (42.2%) at least one clinically relevant bacterium or fungus was detected in TBS during  
227 the study period, whereas in 26 patients (57.8%) no relevant microorganisms were detected in  
228 TBS.

229 A total of 319 TBS were collected in the superinfection group and 124 relevant microorganisms  
230 were detected in these samples. Furthermore, relevant pathogens were detected six times in 23  
231 BAL samples (26.1%). Only in two cases relevant results did not match between BAL and TBS.  
232 Despite high frequency of positive TBS, blood cultures showed only seven different bacterial  
233 species in twelve positive blood culture pairs (Figure 1).

234 In the group without superinfections, 83/114 TBS samples showed growth but without recovery  
235 of clinically relevant lung pathogens. *Candida albicans* was the most frequently isolated non-  
236 relevant organism. In BAL there was also no evidence of relevant microorganisms in the 12

237 samples. However, clinically relevant bacteraemia was detected twice in a total of 152 blood  
238 culture pairs (Figure 1).

239 The detection time points of clinically relevant and non-relevant microorganisms are depicted in  
240 Figure 2. On average, clinically relevant pathogens were detected on day ten after ICU admission  
241 and reflect the hospital-acquired pneumonia (HAP) / ventilator-associated pneumonia (VAP)  
242 spectrum (Figure 2A). Non-relevant pathogens were detected on average on day three post ICU  
243 admission (Figure 2B). The most frequently isolated bacteria per patient were detected:  
244 *Enterococcus* spp. (15/45), *Enterobacter/Citrobacter* (8/45) and *Klebsiella* spp. (7/45).  
245 Additionally, *Streptococcus pneumoniae* (2/45), *Escherichia coli* (2/45), *Enterobacter* spp.  
246 (5/45), *Citrobacter* spp. (3/45), *Pseudomonas aeruginosa* (5/45), *Burkholderia cepacia* (2/45)  
247 and Staphylococci (all coagulase-negative) (13/45)

248 Empirical antimicrobial therapy was given to 40/45 (88.9%) patients, antifungal therapy to 10/45  
249 (22.2%) patients and antiviral therapy to treat concomitant viral infections to 9/45 (20 %)  
250 patients. Figures 2C and D summarize the antibiotic treatment.

251 In ten patients (22.2%) multi drug resistant (MDR) bacteria were detected (*Pseudomonas*  
252 *aeruginosa*, *Entereobacter cloacae* and *Burkholderia cepacia*).

253 Serum reactivation of HSV 1 and 2 was detected in 5 out of 45 patients. HHV 6 was detected  
254 twice, CMV reactivation occurred once and EBV reactivation twice. One patient had a co-  
255 infection with influenza A (Table 2).

256 Furthermore, colonisations with fungi were detected and the isolated organisms included  
257 *Candida* spp. (29/45 patients), non-*Candida* yeast (21/45 patients) and *Aspergillus* spp. (5/45  
258 patients). A detailed overview of relevant pathogens detected in TBS and blood cultures are  
259 shown in Table 2.

260

### 261 **Ventilator-free survival at 28 days**

262 COVID-19 patients with pulmonary superinfections had a substantially lower 28-day ventilator-  
263 free survival than those without superinfections (Figure 3), with a subhazard ratio of 0.37 (95%  
264 Confidence Interval 0.15 – 0.90,  $p = 0.028$ ).

265

266 **Secondary outcomes**

267 Patients with superinfections detected in respiratory specimens were ventilated for significantly  
268 longer time periods (8 vs 37 days,  $p<0.001$ ) and had a significantly longer duration of stay in the  
269 ICU (9 vs 39 days,  $p<0.001$ ) and overall hospitalization time (17 vs 44 days,  $p<0.001$ ) as  
270 compared to patients without superinfections (Table 2).

271

272 **Further outcomes**

273 Patients with pulmonary superinfections had significantly more bacteraemia ( $p=0.004$ ), virus co-  
274 infections other than SARS-CoV-2 ( $p=0.001$ ), colonisation with yeast ( $p=0.004$ ) and infections  
275 with MDR pathogens ( $p<0.001$ ) (Table 2).

276 Longitudinal laboratory inflammation parameters (leukocytes, CRP, PCT and  
277 Neutrophil/Lymphocyte ratio) for days 1-16 are shown in Supplemental Figure 1A and  
278 Supplemental Table 1. Only for CRP, the mixed model evaluation showed a significant  
279 difference with increased CRP in the superinfection group ( $p <0.001$ ). (Supplemental Figure 1 B,  
280 C and D).

281

## 282 **Discussion**

283 In this prospective cohort study of critically ill, ventilated COVID-19 patients the presence of  
284 respiratory bacteria as a proxy of superinfection was associated with extended ventilation times,  
285 increased duration of intensive care and hospitalization and increased need for intensive-care  
286 rescue therapies. Bacterial superinfections were detected in 42.2% of patients in our cohort,  
287 which is slightly higher than reported in previous studies (1, 2, 5, 6, 13, 14, 26). This discrepancy  
288 with other studies might be mainly due to the nature of our cohort consisting of severely ill  
289 patients with CARDS. In addition, differing from other studies, sampling was prospectively and  
290 repetitively scheduled and not only performed at admission as in other studies, which may  
291 account for under-reporting of superinfections. Regional differences can also play an important  
292 role especially in bacterial superinfections and spectrum of resistance. This can explain the  
293 increased rate of superinfections compared to the existing meta-analyses (10, 27, 28).

294 Although some studies have concluded that bacterial superinfections do not play a major role in  
295 disease severity and treatment choices, the results of the present study challenges the  
296 generalizability to severely ill CARDS patients (6, 10). In our cohort, isolation of relevant  
297 respiratory bacteria was associated with more severe COVID-19 disease courses with  
298 significantly longer duration of invasive mechanical ventilation and prolonged ICU and hospital  
299 stays. Compared to other studies investigating the role of superinfection in COVID-19, duration  
300 of ICU stay and length of ventilation was high, reflecting the disease severity of patients  
301 included in this study (7, 10). Additionally, data on the duration of ventilation and ICU stay are  
302 often missing in other studies making comparisons difficult (4, 10, 13, 29, 30). Furthermore, due  
303 to the comparatively high SOFA-Score upon admission but moderate mortality, as in our cohort,  
304 long-term ICU-treatment complications such as nosocomial infections become more frequent.

305 Relevant respiratory bacteria were isolated on average on day ten after ICU admission in our  
306 cohort suggesting mainly nosocomial infections. In contrast to bacterial superinfections observed  
307 in influenza pneumonia, COVID-19 superinfections with Gram-positive bacteria, such as  
308 Pneumococci or Staphylococci, were rare in this study (31). Similar observations were also made  
309 for MERS-CoV and SARS-CoV-1 associated superinfections (32-34). In this study, mainly  
310 Gram-negative pathogens such as *Pseudomonas* and Enterobacteriaceae including MDR bacteria  
311 were isolated, which is in line with previous reported studies (10).

312 Based on the finding that pulmonary bacterial superinfections seem to be mostly nosocomial,  
313 empirical broad-spectrum antimicrobial therapy could be stopped and only treated, if pathogenic

314 bacteria are detected (12, 30). Future prospective, randomized trials to investigate the efficacy of  
315 targeted antimicrobial therapy should be conducted to define best practice regarding prevention  
316 and treatment of bacterial superinfections in COVID-19. The isolation of mainly Gram-negative  
317 rods including MDR led to the use of reserve antibiotics after initial empirical therapy of  
318 nosocomial pneumonia (Figure 2). It is important to consider the short and long-term  
319 consequences that the use of antimicrobials, especially regarding broad spectrum and reserve  
320 antibiotics, may have on drug-resistance. A worrisome potential consequence of the COVID-19  
321 pandemic might be the long-term spread of antimicrobial resistance (AMR) due to increased  
322 exposure of patients to antimicrobial agents that may have been used inappropriately (35). In this  
323 framework, employment of standardized longitudinal screening with early detection and  
324 susceptibility testing before establishment of targeted antimicrobial therapy, could minimize the  
325 use of broad-spectrum and reserve antibiotics, thus reducing AMR.

326 The high rate of yeast detection might be associated with the widespread use of broad-spectrum  
327 empirical antimicrobial therapy (36). Invasive aspergillosis was not detected (37, 38). So far,  
328 only few studies have investigated fungal superinfections in COVID-19 patients (13, 17, 39).  
329 The significance of viral reactivation remains unclear (10). In our study, reactivations of HSV 1,  
330 HSV 2 and HHV 6 in the serum occurred in patients with bacterial superinfections. These  
331 findings support the hypothesis that superinfections associated with increased COVID-19 disease  
332 severity might enhance susceptibility to viral reactivations. Further studies with higher  
333 participant numbers should clarify the significance of this finding.

334 In line with previous studies, conventional clinical laboratory tests such as leukocytes, PCT and  
335 neutrophil/lymphocyte ratio progressions were not associated with pulmonary superinfections  
336 and therefore do not seem very useful for the detection of bacterial superinfections in COVID-19  
337 patients on mechanical ventilation. This complicates the diagnosis of bacterial superinfections  
338 and emphasizes the importance of longitudinal microbiological diagnostics.

339 Advantages of this study are the prospective longitudinal monitoring of respiratory materials  
340 with concomitant recording of demographic data, microbiological evaluations and antimicrobial  
341 therapy in a tertiary care centre in a high-resource setting that did not experience health care  
342 shortage during the first pandemic wave. Furthermore, this study used strict definitions for  
343 relevant respiratory pathogens and the diagnosis of superinfections was performed prospectively  
344 on defined days longitudinally with detection not only of bacterial but also fungal and viral  
345 super- and co-infections.

346 Limitations of the study are the single centre design, small number of patients and the high  
347 number of patients with empirical broad-spectrum antibiotic therapy (>90% of cases) at  
348 admission. Another limitation is the lack of a uniform internationally valid definition of a  
349 bacterial infection of the lower respiratory tract.

350 In summary, the detection of relevant bacterial pulmonary superinfection was associated with a  
351 more severe disease course in COVID-19 patients, especially a lower likelihood of ventilator-  
352 free survival at 28 days. Future trials should investigate the effect of tailored antimicrobial  
353 therapy on outcome, antibiotic resistance and drug use based on longitudinal assessment of  
354 respiratory tract cultures.

355

356 **Transparency Declaration**

357 **Conflicts of interest**

358 All authors declare no conflicts of interest in this paper.

359 **Funding**

360 Promedica Foundation 1449/M to SDB and unrestricted funds to RAS. The funders had no role  
361 in study design, performance, analysis and interpretation of findings.

362 **Authors' contributions**

363 PKB, ASZ, RAS, SDB designed the study and provided funding and infrastructure. PKB and  
364 SDB were responsible for the ethical approval. PKB, PWG, DAH, PMF and SDB performed the  
365 statistical analysis. PKB, ASZ, DAH, PDW, CTA, AGM, SMS, FA, MAM, JB, MPH, PMF,  
366 RAS and SDB collected, analysed and interpreted the data. PKB, DAH, SDB, ASZ and FA  
367 wrote the first draft of the manuscript.

368 All authors revised the manuscript and approved the final version.

369  
370  
371  
372

## 373 **References**

- 374 1. Grasselli G, Zangrillo A, Zanella A, Antonelli M, Cabrini L, Castelli A, et al. Baseline  
375 Characteristics and Outcomes of 1591 Patients Infected With SARS-CoV-2 Admitted to ICUs of the  
376 Lombardy Region, Italy. *Jama*. 2020.
- 377 2. Huang C, Wang Y, Li X, Ren L, Zhao J, Hu Y, et al. Clinical features of patients infected with  
378 2019 novel coronavirus in Wuhan, China. *Lancet* (London, England). 2020;395(10223):497-506.
- 379 3. Wendel Garcia PD, Fumeaux T, Guerci P, Heuberger DM, Montomoli J, Roche-Campo F, et al.  
380 Prognostic factors associated with mortality risk and disease progression in 639 critically ill patients with  
381 COVID-19 in Europe: Initial report of the international RISC-19-ICU prospective observational cohort.  
382 *EClinicalMedicine*.
- 383 4. Wu C, Chen X, Cai Y, Xia J, Zhou X, Xu S, et al. Risk Factors Associated With Acute Respiratory  
384 Distress Syndrome and Death in Patients With Coronavirus Disease 2019 Pneumonia in Wuhan, China.  
385 *JAMA internal medicine*. 2020.
- 386 5. Zhu N, Zhang D, Wang W, Li X, Yang B, Song J, et al. A Novel Coronavirus from Patients with  
387 Pneumonia in China, 2019. *N Engl J Med*. 2020;382(8):727-33.
- 388 6. Rawson TM, Moore LSP, Zhu N, Ranganathan N, Skolimowska K, Gilchrist M, et al. Bacterial and  
389 fungal co-infection in individuals with coronavirus: A rapid review to support COVID-19 antimicrobial  
390 prescribing. *Clin Infect Dis*. 2020.
- 391 7. Zhou F, Yu T, Du R, Fan G, Liu Y, Liu Z, et al. Clinical course and risk factors for mortality of  
392 adult inpatients with COVID-19 in Wuhan, China: a retrospective cohort study. *Lancet* (London, England).  
393 2020.
- 394 8. Martin-Loeches I, Sanchez-Corral A, Diaz E, Granada RM, Zaragoza R, Villavicencio C, et al.  
395 Community-acquired respiratory coinfection in critically ill patients with pandemic 2009 influenza A(H1N1)  
396 virus. *Chest*. 2011;139(3):555-62.
- 397 9. Kreitmam L, Monard C, Dauwalder O, Simon M, Argaud L. Early bacterial co-infection in ARDS  
398 related to COVID-19. *Intensive care medicine*. 2020:1-3.
- 399 10. Lansbury L, Lim B, Baskaran V, Lim WS. Co-infections in people with COVID-19: a systematic  
400 review and meta-analysis. *The Journal of infection*. 2020.
- 401 11. Hughes S, Troise O, Donaldson H, Mughal N, Moore LSP. Bacterial and fungal coinfection  
402 among hospitalized patients with COVID-19: a retrospective cohort study in a UK secondary-care setting.  
403 *Clinical Microbiology and Infection*. 2020.
- 404 12. Coppola S, Ciabattini A, Pozzi T, Castagna V, Bassi GL, Chiumello D. Hazardous mismatch  
405 between pulmonary pathogens and antibiotic treatments in COVID-19 patients. *British journal of*  
406 *anaesthesia*. 2020.
- 407 13. Yang X, Yu Y, Xu J, Shu H, Xia J, Liu H, et al. Clinical course and outcomes of critically ill  
408 patients with SARS-CoV-2 pneumonia in Wuhan, China: a single-centered, retrospective, observational  
409 study. *Lancet Respir Med*. 2020;8(5):475-81.
- 410 14. Zhang J, Zhou L, Yang Y, Peng W, Wang W, Chen X. Therapeutic and triage strategies for 2019  
411 novel coronavirus disease in fever clinics. *Lancet Respir Med*. 2020;8(3):e11-e2.
- 412 15. He Y, Li W, Wang Z, Chen H, Tian L, Liu D. Nosocomial infection among patients with COVID-19:  
413 A retrospective data analysis of 918 cases from a single center in Wuhan, China. *Infection control and*  
414 *hospital epidemiology*. 2020;41(8):982-3.
- 415 16. Ruan Q, Yang K, Wang W, Jiang L, Song J. Clinical predictors of mortality due to COVID-19  
416 based on an analysis of data of 150 patients from Wuhan, China. *Intensive care medicine*. 2020.
- 417 17. Chen N, Zhou M, Dong X, Qu J, Gong F, Han Y, et al. Epidemiological and clinical characteristics  
418 of 99 cases of 2019 novel coronavirus pneumonia in Wuhan, China: a descriptive study. *Lancet* (London,  
419 England). 2020;395(10223):507-13.
- 420 18. Cox MJ, Loman N, Bogaert D, O'Grady J. Co-infections: potentially lethal and unexplored in  
421 COVID-19. *The Lancet Microbe*.
- 422 19. Kim D, Quinn J, Pinsky B, Shah NH, Brown I. Rates of Co-infection Between SARS-CoV-2 and  
423 Other Respiratory Pathogens. *Jama*. 2020;323(20):2085-6.
- 424 20. Gattinoni L, Chiumello D, Caironi P, Busana M, Romitti F, Brazzi L, et al. COVID-19 pneumonia:  
425 different respiratory treatments for different phenotypes? *Intensive care medicine*. 2020;46(6):1099-102.
- 426 21. Ranieri VM, Rubenfeld GD, Thompson BT, Ferguson ND, Caldwell E, Fan E, et al. Acute  
427 respiratory distress syndrome: the Berlin Definition. *Jama*. 2012;307(23):2526-33.
- 428 22. Frey PM, Marti GR, Droz S, de Roche von Arx M, Suter-Riniker F, Aujesky D, et al. Bacterial  
429 colonization of handheld devices in a tertiary care setting: a hygiene intervention study. *Antimicrobial*  
430 *resistance and infection control*. 2019;8:97.



- 431 23. Corman VM, Landt O, Kaiser M, Molenkamp R, Meijer A, Chu DK, et al. Detection of 2019 novel  
432 coronavirus (2019-nCoV) by real-time RT-PCR. *Euro surveillance : bulletin European sur les maladies*  
433 *transmissibles = European communicable disease bulletin*. 2020;25(3).
- 434 24. Patterson TF, Thompson GR, 3rd, Denning DW, Fishman JA, Hadley S, Herbrecht R, et al.  
435 *Practice Guidelines for the Diagnosis and Management of Aspergillosis: 2016 Update by the Infectious*  
436 *Diseases Society of America*. *Clin Infect Dis*. 2016;63(4):e1-e60.
- 437 25. Chastre J, Fagon JY. Ventilator-associated pneumonia. *American journal of respiratory and*  
438 *critical care medicine*. 2002;165(7):867-903.
- 439 26. Clancy CJ, Nguyen MH. COVID-19, superinfections and antimicrobial development: What can we  
440 expect? *Clin Infect Dis*. 2020.
- 441 27. Barrasa H, Rello J, Tejada S, Martín A, Balziskueta G, Vinuesa C, et al. SARS-CoV-2 in Spanish  
442 Intensive Care Units: Early experience with 15-day survival in Vitoria. *Anaesthesia, critical care & pain*  
443 *medicine*. 2020.
- 444 28. Tagarro A, Epalza C, Santos M, Sanz-Santaefemia FJ, Otheo E, Moraleda C, et al. Screening  
445 and Severity of Coronavirus Disease 2019 (COVID-19) in Children in Madrid, Spain. *JAMA pediatrics*.  
446 2020.
- 447 29. Kim D, Quinn J, Pinsky B, Shah NH, Brown I. Rates of Co-infection Between SARS-CoV-2 and  
448 Other Respiratory Pathogens. *Jama*. 2020.
- 449 30. Zhu X, Ge Y, Wu T, Zhao K, Chen Y, Wu B, et al. Co-infection with respiratory pathogens among  
450 COVID-2019 cases. *Virus research*. 2020;285:198005.
- 451 31. Martin-Loeches I, van Someren Greve F, Schultz MJ. Bacterial pneumonia as an influenza  
452 complication. *Current opinion in infectious diseases*. 2017;30(2):201-7.
- 453 32. Arabi YM, Balkhy HH, Hayden FG, Bouchama A, Luke T, Baillie JK, et al. Middle East  
454 Respiratory Syndrome. *N Engl J Med*. 2017;376(6):584-94.
- 455 33. Assiri A, Al-Tawfiq JA, Al-Rabeeh AA, Al-Rabiah FA, Al-Hajjar S, Al-Barrak A, et al.  
456 Epidemiological, demographic, and clinical characteristics of 47 cases of Middle East respiratory  
457 syndrome coronavirus disease from Saudi Arabia: a descriptive study. *The Lancet Infectious diseases*.  
458 2013;13(9):752-61.
- 459 34. Hwang DM, Chamberlain DW, Poutanen SM, Low DE, Asa SL, Butany J. Pulmonary pathology of  
460 severe acute respiratory syndrome in Toronto. *Modern pathology : an official journal of the United States*  
461 *and Canadian Academy of Pathology, Inc*. 2005;18(1):1-10.
- 462 35. Rawson TM, Moore LSP, Castro-Sanchez E, Charani E, Davies F, Satta G, et al. COVID-19 and  
463 the potential long-term impact on antimicrobial resistance. *The Journal of antimicrobial chemotherapy*.  
464 2020.
- 465 36. de Oliveira Santos GC, Vasconcelos CC, Lopes AJO, de Sousa Cartágenes MDS, Filho A, do  
466 Nascimento FRF, et al. Candida Infections and Therapeutic Strategies: Mechanisms of Action for  
467 Traditional and Alternative Agents. *Front Microbiol*. 2018;9:1351.
- 468 37. Koehler P, Cornely OA, Böttiger BW, Dusse F, Eichenauer DA, Fuchs F, et al. COVID-19  
469 associated pulmonary aspergillosis. *Mycoses*. 2020;63(6):528-34.
- 470 38. Wang J, Yang Q, Zhang P, Sheng J, Zhou J, Qu T. Clinical characteristics of invasive pulmonary  
471 aspergillosis in patients with COVID-19 in Zhejiang, China: a retrospective case series. *Critical care*  
472 *(London, England)*. 2020;24(1):299.
- 473 39. Wang Z, Yang B, Li Q, Wen L, Zhang R. Clinical Features of 69 Cases with Coronavirus Disease  
474 2019 in Wuhan, China. *Clin Infect Dis*. 2020.

475

**Table 1. Demographic and clinical characteristics as well as risk factors of COVID-19 patients stratified according to presence or absence of relevant pathogens in tracheobronchial secretions (TBS) reflecting superinfection.** The data are presented as median (IQR) or number and (percentage %). The two groups were compared using Chi-Square Test/Fisher Exact method for nominal distributed data or the Mann Whitney test for scale level distributed data. The significance level is  $p < 0.05$ .

|                                                | Overall (n=45)   | No Superinfection (n=26) | Superinfection (n=19) | P-value |
|------------------------------------------------|------------------|--------------------------|-----------------------|---------|
| <b>Baseline Characteristics</b>                |                  |                          |                       |         |
| Age median (IQR) in years                      | 60 (54-69)       | 61.5 (54-71)             | 59 (54-69)            | 0.654   |
| Male [n/%]                                     | 35 (77.8%)       | 19 (73.1%)               | 16 (84.2%)            | 0.375   |
| Weight [kg]                                    | 83 (75-99)       | 80 (72.5-90)             | 92 (78-100)           | 0.049   |
| Height [cm]                                    | 175 (165-182)    | 172 (160-180)            | 176 (169-185)         | 0.112   |
| Body mass index [kg/m <sup>2</sup> ]           | 27.8 (25.7-31.6) | 27.5 (25.6-30.6)         | 27.8 (26.8-35)        | 0.346   |
| <b>Comorbid conditions</b>                     |                  |                          |                       |         |
| Myocardial Infarction / Ischemic Heart Disease | 6 (13.3%)        | 5 (19.2%)                | 1 (5.3%)              | 0.222   |
| Art Hypertension                               | 26 (57.8%)       | 16 (61.5%)               | 10 (52.6%)            | 0.550   |
| Chronic kidney disease                         | 12 (26.7%)       | 10 (38.5%)               | 2 (10.5%)             | 0.047   |
| Dialysis                                       | 1 (2.2%)         | 1 (3.8%)                 | 0 (0%)                | 0.999   |
| Oral hypoglycaemic agents controlled diabetes  | 5 (11.1%)        | 3 (11.5%)                | 2 (10.5%)             | 0.999   |
| Insulin-dependent diabetes                     | 14 (31.1%)       | 7 (26.9%)                | 7 (36.8%)             | 0.528   |
| Asthma                                         | 1 (2.2%)         | 1 (3.8%)                 | 0 (0%)                | 0.999   |
| COPD                                           | 5 (11.1%)        | 4 (15.4%)                | 1 (5.3%)              | 0.378   |
| Cardiovascular disease                         | 7 (15.6%)        | 6 (23.1%)                | 1 (5.3%)              | 0.211   |
| Renal or liver transplantation                 | 5 (11.1%)        | 4 (15.4%)                | 1 (5.3%)              | 0.378   |
| Immunosuppression                              | 7 (15.6%)        | 5 (19.2%)                | 2 (10.5%)             | 0.222   |
| Tumour disease                                 | 4 (8.9%)         | 2 (7.7%)                 | 2 (10.5%)             | 0.999   |
| Smoking                                        | 14 (31.1%)       | 7 (26.9%)                | 7 (36.8%)             | 0.625   |
| Alcohol abuse                                  | 1 (2.2%)         | 0 (0%)                   | 1 (5.3%)              | 0.999   |
| Drug abuse                                     | 0 (0%)           | 0 (0%)                   | 0 (0%)                | 1.000   |

| <b>Medical therapy before admission</b> |            |         |           |       |
|-----------------------------------------|------------|---------|-----------|-------|
| Statins                                 | 10 (22.7%) | 6 (24%) | 4 (21.1%) | 0.999 |
| ACE-Inhibitor                           | 7 (15.9%)  | 4 (16%) | 3 (15.8%) | 0.999 |

| <b>Scores/Index</b>                                       |              |              |                |       |
|-----------------------------------------------------------|--------------|--------------|----------------|-------|
| Sepsis-related organ failure assessment score (SOFA)      | 8 (5-10)     | 8 (3-10)     | 9 (7-10)       | 0.480 |
| Simplified Acute Physiology Score (SAPS) II               | 36 (25-50)   | 32.5 (24-50) | 42 (28-51)     | 0.275 |
| PaO <sub>2</sub> /FiO <sub>2</sub> ratio low at admission | 122 (94-177) | 129 (97-200) | 108 (85-163.5) | 0.228 |

| <b>Organ failure during ICU stay</b> |            |            |            |              |
|--------------------------------------|------------|------------|------------|--------------|
| Acute kidney disease                 | 27 (60%)   | 15 (57.7%) | 12 (63.2%) | 0.712        |
| Dialysis                             | 18 (40%)   | 9 (34.6%)  | 9 (47.4%)  | 0.388        |
| Ventilation Therapy                  | 40 (88.9%) | 21 (80.8%) | 19 (100%)  | <b>0.043</b> |
| Extracorporeal Life Support (ECLS)   | 8 (17.8%)  | 3 (11.5%)  | 5 (26.3%)  | 0.253        |

| <b>Rescue therapies</b> |            |            |            |              |
|-------------------------|------------|------------|------------|--------------|
| Prone Position          | 28 (62.2%) | 11 (42.3%) | 17 (89.5%) | <b>0.001</b> |
| iNO                     | 11 (24.4%) | 5 (19.2%)  | 6 (31.6%)  | 0.341        |
| Tracheotomy             | 20 (44.4%) | 6 (23.1%)  | 14 (73.7%) | <b>0.001</b> |

| <b>Timing [days]</b>               |            |             |            |              |
|------------------------------------|------------|-------------|------------|--------------|
| Time to ICU admission              | 2 (1-6)    | 2 (1-6)     | 3 (1-6)    | 0.636        |
| Duration prone position            | 6 (1-10)   | 1.5 (1-7)   | 6 (4-10)   | <b>0.022</b> |
| Duration iNO therapy               | 3 (1-6)    | 1 (1-3)     | 4.5 (1-22) | 0.349        |
| Duration Intubation to tracheotomy | 20 (10-33) | 10.5 (9-21) | 27 (15-33) | 0.114        |

| <b>Laboratory values at admission</b> |                   |               |               |              |
|---------------------------------------|-------------------|---------------|---------------|--------------|
| WBC count (G/L)                       | 7.7 (5.7-10.7)    | 7.5 (5.7-10)  | 8 (5.3-13.4)  | 0.515        |
| Haemoglobin (gr/l)                    | 118.5 (101.5-133) | 117 (107-132) | 126 (98-134)  | 0.896        |
| Haematocrit (%)                       | 0.4 (0.3-0.4)     | 0.4 (0.3-0.4) | 0.4 (0.3-0.4) | 0.619        |
| Platelet count (G/L)                  | 199 (169.5-272)   | 200 (177-271) | 190 (154-297) | 0.776        |
| ALT(U/L)                              | 42.5 (25.5-65.5)  | 31 (24-60)    | 56 (33-72)    | <b>0.008</b> |
| LDH (U/L)                             | 676 (527-842.5)   | 619 (471-742) | 772 (626-876) | 0.144        |
| Alkaline Phosphatase (U/L)            | 74.5 (53.5-103.5) | 77.5 (56-108) | 61 (53-98)    | 0.308        |

|                          |                    |               |                |              |
|--------------------------|--------------------|---------------|----------------|--------------|
| Urea (mmol/l)            | 6 (4.3-10.3)       | 6.2 (4.1-7.9) | 6 (4.4-12.2)   | 0.651        |
| Creatinine (umol/l)      | 92.5 (67-138.5)    | 95 (70-128)   | 91 (57-149)    | 0.387        |
| Serum Sodium (mmol/L)    | 138 (134-141)      | 137 (135-140) | 141 (134-146)  | 0.203        |
| Serum potassium (mmol/L) | 3.9 (3.7-4.5)      | 4.1 (3.7-4.4) | 3.8 (3.5-4.7)  | 0.601        |
| CRP (mg/L)               | 168.5 (83.5-276.5) | 124 (62-238)  | 255 (102-301)  | <b>0.034</b> |
| PCT (mcg/L)              | 0.3 (0.2-1.2)      | 0.2 (0.1-1.7) | 0.4 (0.2-1.2)  | 0.060        |
| IL6 (ng/L)               | 127 (71.2-454)     | 122 (84-697)  | 127 (62.7-263) | 0.554        |

| <b>Special drug therapy</b>   |            |           |            |              |
|-------------------------------|------------|-----------|------------|--------------|
| Steroids                      | 21 (46.7%) | 8 (30.8%) | 13 (68.4%) | <b>0.012</b> |
| Hydroxychloroquine            | 27 (61.4%) | 13 (52%)  | 14 (73.7%) | 0.143        |
| Lopinavir/ritonavir           | 7 (15.9%)  | 4 (16%)   | 3 (15.8%)  | 0.999        |
| Remdesivir                    | 8 (18.2%)  | 4 (16%)   | 4 (21.1%)  | 0.704        |
| Tocilizumab                   | 2 (4.7%)   | 2 (8.3%)  | 0 (0%)     | 0.501        |
| empiric antimicrobial therapy | 40 (88.3%) | 22 (88%)  | 18 (94.7%) | 0.441        |

| <b>Sample size overall</b> |     |     |     |  |
|----------------------------|-----|-----|-----|--|
| TBS                        | 433 | 114 | 319 |  |
| BAL                        | 35  | 12  | 23  |  |
| Blood culture              | 455 | 152 | 303 |  |

**Table 2 Clinical outcomes and microorganisms detected**

The data are presented as median (95 CI of Median) or number and (percentage %). 95%CI of the difference or Relative Risk (95 CI) were calculated too. The two groups were compared using Chi-Square Test/Fisher Exact method for nominal distributed data or the Mann Whitney test for scale level distributed data. The significance level is  $p < 0.05$ .

|                                                    | No Superinfection (n=26) | Superinfection (n=19) | 95%CI of the difference or Relative Risk (95 CI) | p-value      |
|----------------------------------------------------|--------------------------|-----------------------|--------------------------------------------------|--------------|
| <b>Timing</b>                                      |                          |                       |                                                  |              |
| Duration ventilation                               | 8 (5.9 - 15.1)           | 37 (22.2 - 43.7)      | 10 to 34                                         | <0.001       |
| Duration ICU                                       | 9 (7.0 - 14.9)           | 39 (28.5 - 57.0)      | 15 to 38                                         | <0.001       |
| Duration hospitalisation                           | 17 (14.4 - 26.4)         | 44 (34.2 - 63.3)      | 10 to 41                                         | <0.001       |
| <b>Superinfection data</b>                         |                          |                       |                                                  |              |
| Patients died                                      | 6 (23.1%)                | 4 (21.1%)             | 0.95 (0.58 to 1.92)                              | 0.999        |
| Patients with bacterial respiratory superinfection | 0 (0%)                   | 19 (100%)             |                                                  |              |
| Patients with superinfection in BAL                | 0 (0%)                   | 6 (31.6%)             | infinity (1.674 to infinity)                     | <b>0.003</b> |
| Patients with bloodstream infection                | 2 (7.7%)                 | 9 (47.4%)             | 10.8 (1.92 to 53.53)                             | <b>0.004</b> |
| Patients with virus infection                      | 1 (3.85%)                | 9 (47.4%)             | 7.143 (1.72 to 40.27)                            | <b>0.001</b> |
| Patients with aspergillus detection                | 2 (7.7%)                 | 3 (15.8%)             | 1.5 (0.72 to 5.20)                               | 0.636        |
| Patients with Yeast detection                      | 12 (46.2%)               | 17 (89.5%)            | 2.17 (1.33 to 3.51)                              | <b>0.004</b> |
| Patients with multi drug resistant pathogens       | 0 (0%)                   | 10 (52.6%)            | infinity (6.076 to infinity)                     | <0.001       |
| <b>Causative microbiology</b>                      |                          |                       |                                                  |              |
| <b>Microbiology of TBS superinfections</b>         |                          |                       |                                                  |              |
| Overall pathogen detection in TBS                  | 83                       | 368                   |                                                  |              |
| Relevant pathogen detection in TBS                 | 0 (0%)                   | 124 (33.7%)           |                                                  |              |
| <i>Citrobacter freundii, koseri</i>                | 0 (0%)                   | 8 (2.2%)              |                                                  |              |
| <i>Enterobacter cloacae</i>                        | 0 (0%)                   | 9 (2.5%)              |                                                  |              |
| <i>Escherichia coli</i>                            | 0 (0%)                   | 2 (0.5%)              |                                                  |              |
| <i>Klebsiella aerogenes</i>                        | 0 (0%)                   | 8 (2.2%)              |                                                  |              |
| <i>Klebsiella pneumoniae</i>                       | 0 (0%)                   | 18 (4.8%)             |                                                  |              |
| <i>Legionella pneumophila</i>                      | 0 (0%)                   | 2 (0.5%)              |                                                  |              |
| <i>Pseudomonas aeruginosa</i>                      | 0 (0%)                   | 49 (13.3%)            |                                                  |              |

|                                                    |              |                    |
|----------------------------------------------------|--------------|--------------------|
| <i>Streptococcus pneumoniae</i>                    | 0 (0%)       | 2 (0.5%)           |
| <i>Burkholderia cepacia</i>                        | 0 (0%)       | 24 (6.5%)          |
| <i>Morganella morganii</i>                         | 0 (0%)       | 2 (0.5%)           |
| <b>Microbiology of bloodstream superinfections</b> |              |                    |
| Overall relevant positive detection                | 2/152 (1.3%) | 12/303 (4.0%)      |
| <i>Citrobacter</i>                                 | 0 (0%)       | 2 (16.7%)          |
| <i>Enterococci faecalis and faecium</i>            | 1 (50%)      | 6 (50%)            |
| <i>Klebsiella aerogenes</i>                        | 0 (0%)       | 1 (8.3%)           |
| <i>Klebsiella pneumonia</i>                        | 0 (0%)       | 1 (8.3%)           |
| <i>Moraxella spp</i>                               | 1 (50%)      | 0 (0%)             |
| <i>Candida glabrata</i>                            | 0 (0%)       | 1 (8.3%)           |
| <i>Pseudomonas aeruginosa</i>                      | 0 (0%)       | 1 (8.3%)           |
| <b>PCR diagnostic</b>                              |              |                    |
| Atypical pneumonia pathogens (n=35)                | 0 (0%)       | 1 (%) (Legionella) |
| <b>Causative virology superinfection</b>           |              |                    |
| Overall                                            | 2            | 9                  |
| Influenza A                                        | 0 (0%)       | 1 (11.1%)          |
| Influenza B                                        | 0 (0%)       | 0 (0%)             |
| Respiratory viruses block analysis (n=34)          | 0 (0%)       | 0 (0%)             |
| HSV 1 (PCR in blood)                               | 0 (0%)       | 5 (55.5%)          |
| HSV 2 (PCR in blood)                               | 0 (0%)       | 0 (0%)             |
| HHV6 (PCR in blood)                                | 0 (0%)       | 2 (22.2%)          |
| CMV (PCR in blood)                                 | 1 (50%)      | 0 (0%)             |
| EBV (PCR in blood)                                 | 1 (50%)      | 1 (11.1%)          |

**Figure 1. Study Flow Diagram**

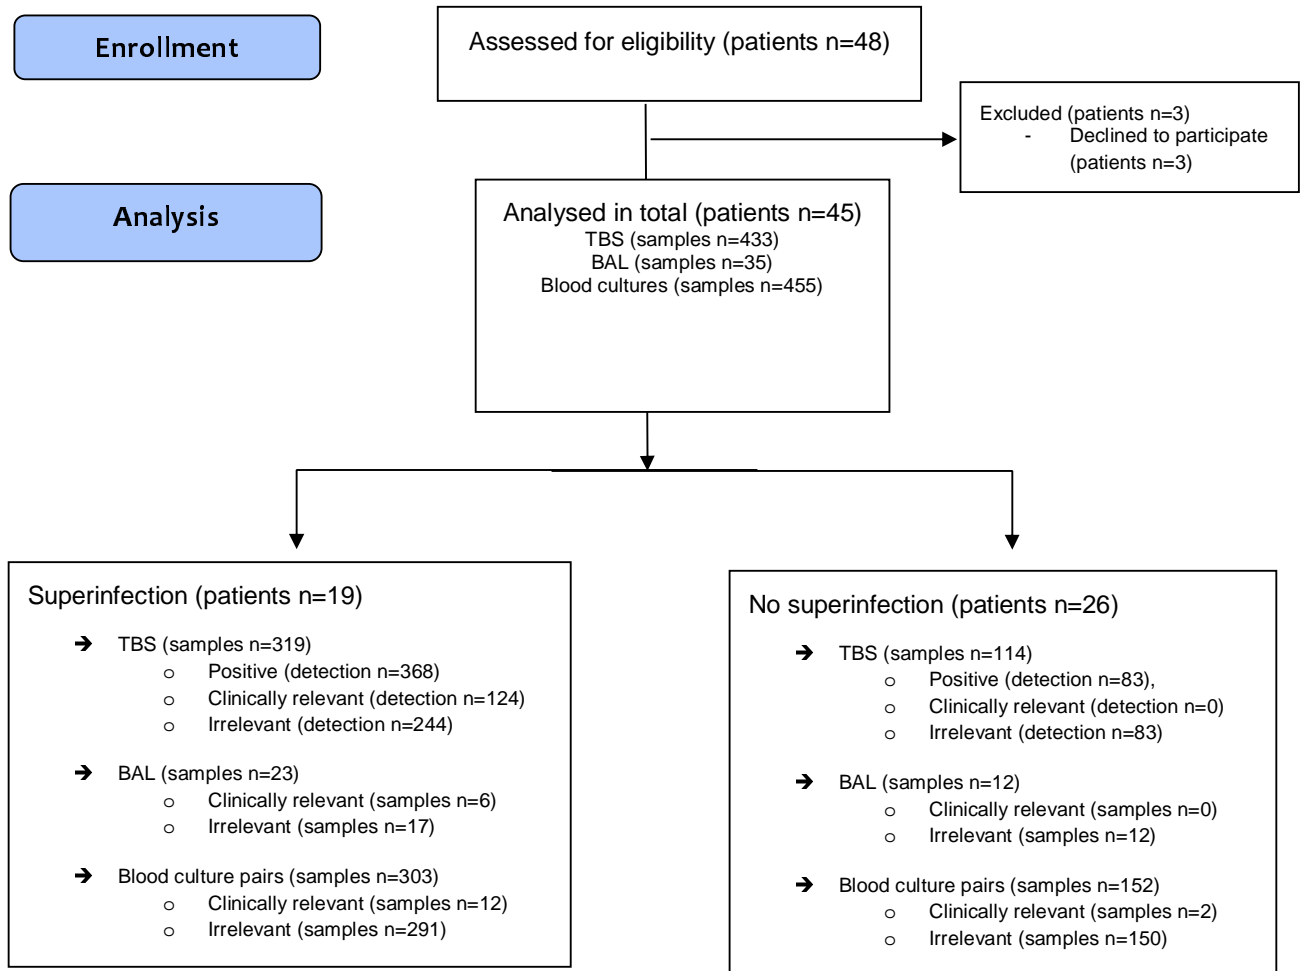

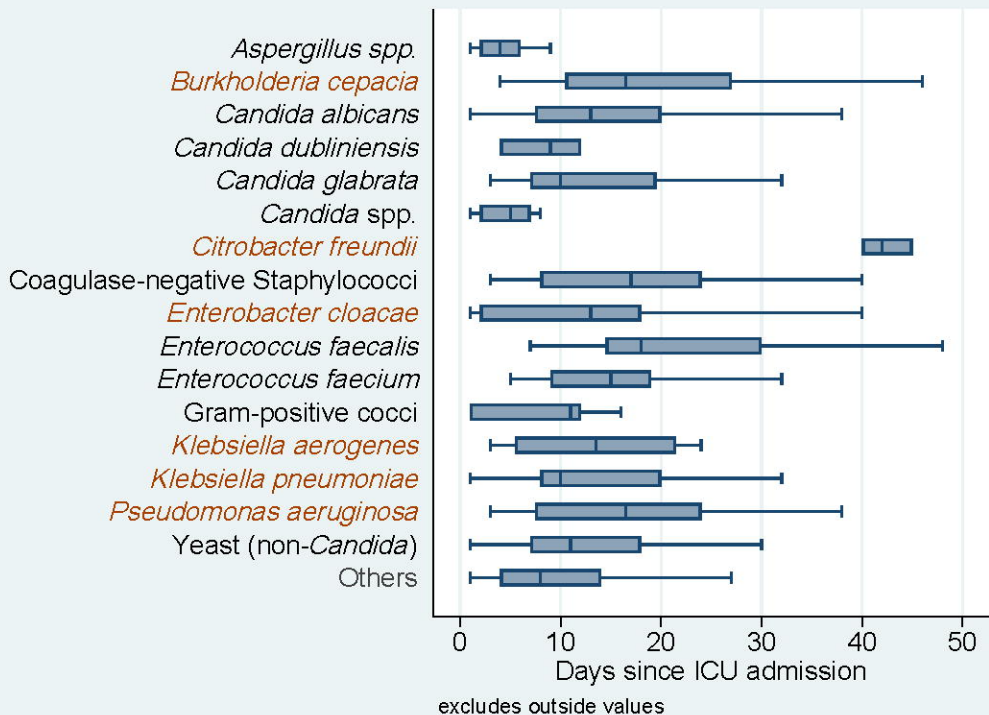



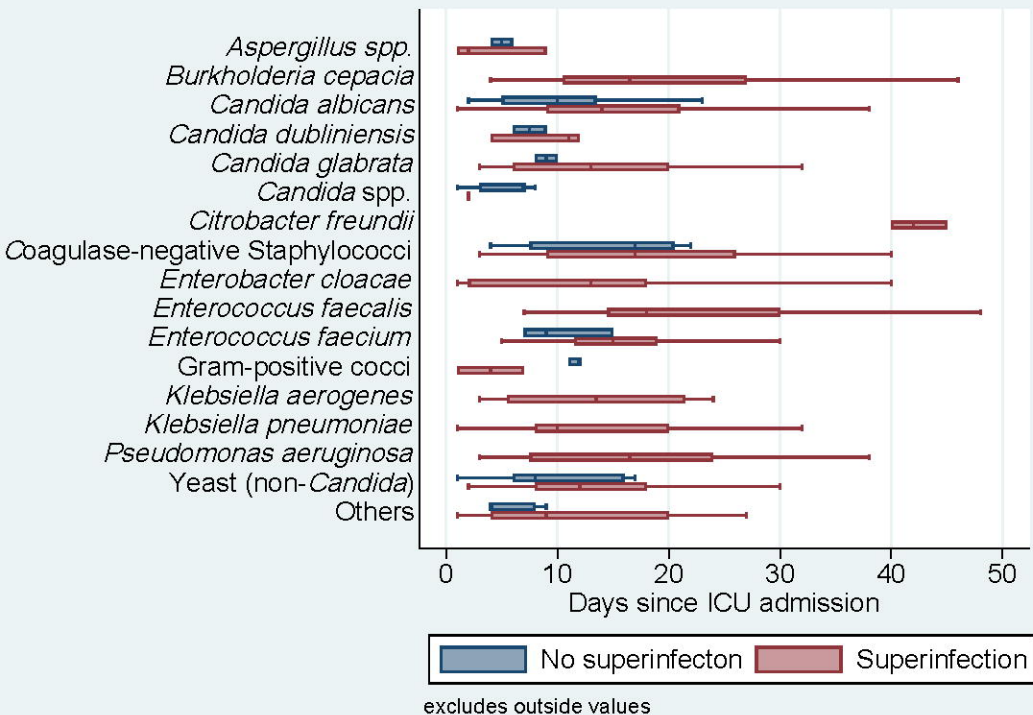

excludes outside values

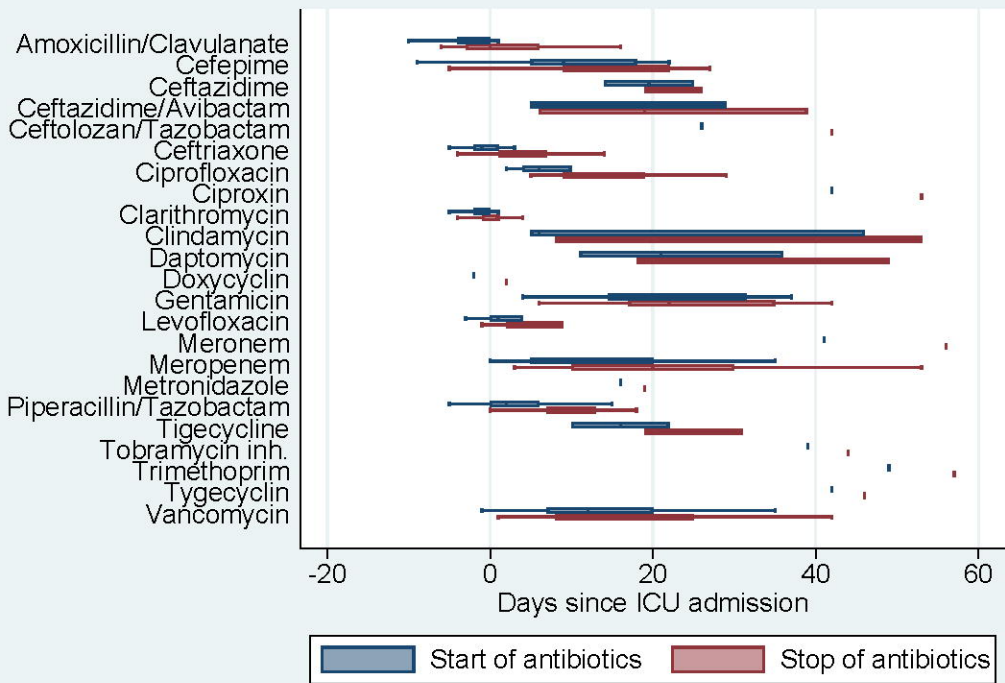

excludes outside values

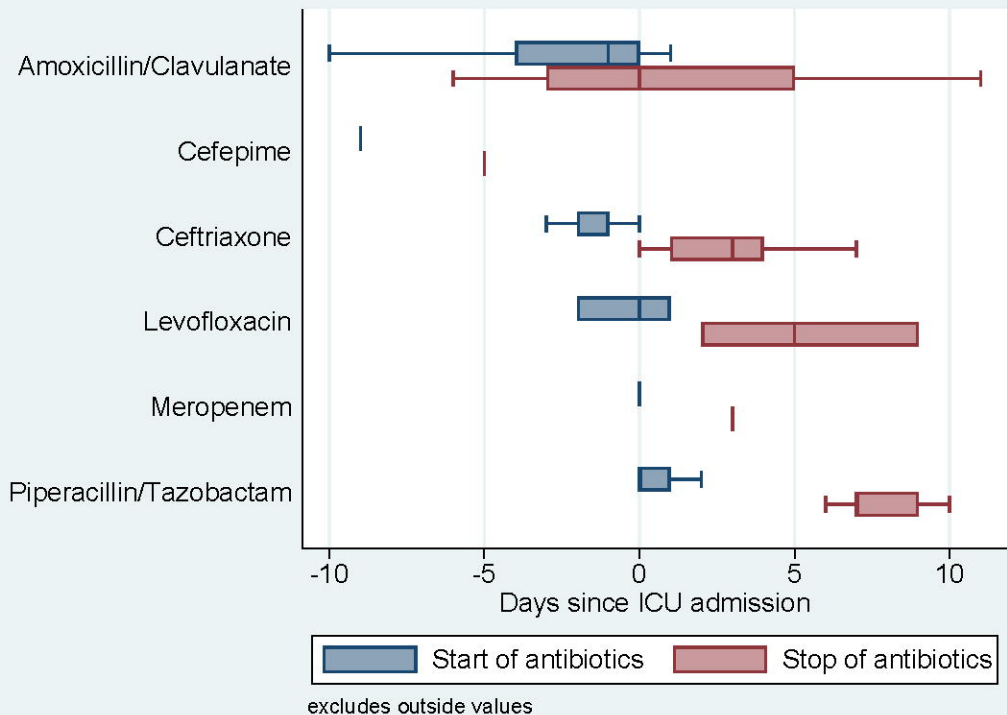

Proportion of ventilator-free survivors within 28 days

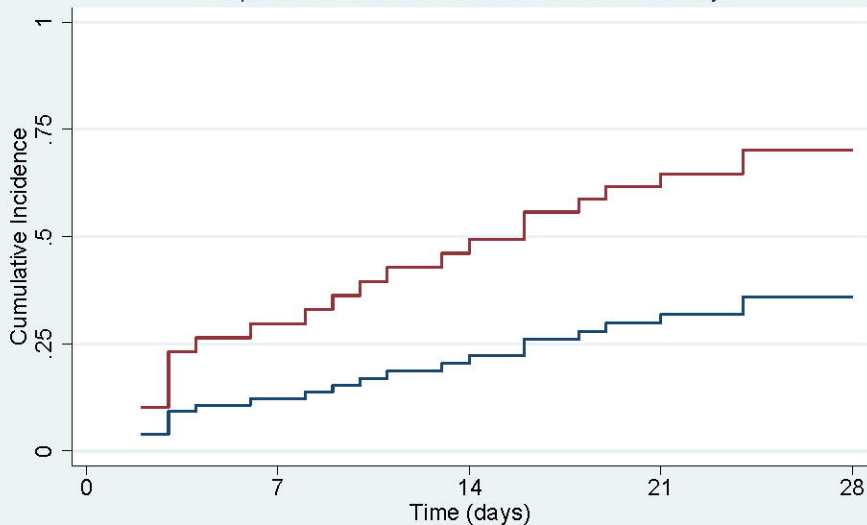

| Number at risk    |    |  |    |    |    |    |
|-------------------|----|--|----|----|----|----|
| Superinfection    | 19 |  | 16 | 16 | 12 | 11 |
| No superinfection | 21 |  | 13 | 5  | 3  | 1  |

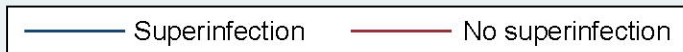

Source: https://medrxiv.org/content/10.1101/2020.09.10.20191882v1.full.pdf
